# Supplementary material
Source: ML conference proceedings conference paper supplement (https://proceedings.mlr.press/v80/heinonen18a.html)
Supplement: Supplementary file [file heinonen18a-supp.pdf]

---

# Learning unknown ODE models with Gaussian processes

## SUPPLEMENTARY DOCUMENT

---

Markus Heinonen<sup>1,2,\*</sup>

MARKUS.O.HEINONEN@AALTO.FI

Çagatay Yıldız<sup>1,\*</sup>

CAGATAY.YILDIZ@AALTO.FI

Henrik Mannerström<sup>1</sup>

HENRIK.MANNERSTROM@AALTO.FI

Jukka Intosalmi<sup>1</sup>

JUKKA.INTOSALMI@AALTO.FI

Harri Lähdesmäki<sup>1</sup>

HARRI.LAHDESMAKI@AALTO.FI

<sup>1</sup>Aalto University, Finland; <sup>2</sup>Helsinki Institute of Information Technology HIIT, Finland

\*Joint first author

## 1. Sensitivity Equations

In the main text, the sensitivity equation is formulated using matrix notation

$$\dot{S}(t) = J(t)S(t) + R(t). \quad (1)$$

Here, the time-dependent matrices are obtained by differentiating the vector valued functions with respect to vectors i.e.

$$S(t) = \begin{bmatrix} \frac{dx_1(t,U)}{du_1} & \frac{dx_1(t,U)}{du_2} & \dots & \frac{dx_1(t,U)}{du_{MD}} \\ \frac{dx_2(t,U)}{du_1} & \frac{dx_2(t,U)}{du_2} & \dots & \frac{dx_2(t,U)}{du_{MD}} \\ \dots & \dots & \dots & \dots \\ \dots & \dots & \dots & \dots \\ \frac{dx_D(t,U)}{du_1} & \frac{dx_D(t,U)}{du_2} & \dots & \frac{dx_D(t,U)}{du_{MD}} \end{bmatrix}_{D \times MD} \quad (2)$$

$$J(t) = \begin{bmatrix} \frac{\partial f(\mathbf{x}(t),U)_1}{\partial x_1} & \frac{\partial f(\mathbf{x}(t),U)_1}{\partial x_2} & \dots & \frac{\partial f(\mathbf{x}(t),U)_1}{\partial x_D} \\ \frac{\partial f(\mathbf{x}(t),U)_2}{\partial x_1} & \frac{\partial f(\mathbf{x}(t),U)_2}{\partial x_2} & \dots & \frac{\partial f(\mathbf{x}(t),U)_2}{\partial x_D} \\ \dots & \dots & \dots & \dots \\ \dots & \dots & \dots & \dots \\ \frac{\partial f(\mathbf{x}(t),U)_D}{\partial x_1} & \frac{\partial f(\mathbf{x}(t),U)_D}{\partial x_2} & \dots & \frac{\partial f(\mathbf{x}(t),U)_D}{\partial x_D} \end{bmatrix}_{D \times D} \quad (3)$$

$$R(t) = \begin{bmatrix} \frac{\partial f(\mathbf{x}(t),U)_1}{\partial u_1} & \frac{\partial f(\mathbf{x}(t),U)_1}{\partial u_2} & \dots & \frac{\partial f(\mathbf{x}(t),U)_1}{\partial u_{MD}} \\ \frac{\partial f(\mathbf{x}(t),U)_2}{\partial u_1} & \frac{\partial f(\mathbf{x}(t),U)_2}{\partial u_2} & \dots & \frac{\partial f(\mathbf{x}(t),U)_2}{\partial u_{MD}} \\ \dots & \dots & \dots & \dots \\ \dots & \dots & \dots & \dots \\ \frac{\partial f(\mathbf{x}(t),U)_D}{\partial u_1} & \frac{\partial f(\mathbf{x}(t),U)_D}{\partial u_2} & \dots & \frac{\partial f(\mathbf{x}(t),U)_D}{\partial u_{MD}} \end{bmatrix}_{D \times MD} \quad (4)$$

## 2. Optimization

Below is the explicit form of the log posterior. Note that we introduce  $\mathbf{u} = \text{vec}(U)$  and  $\Omega = \text{diag}(\omega_1^2, \dots, \omega_D^2)$  for notational simplicity.

$$\log \mathcal{L} = \log p(U|\boldsymbol{\theta}) + \log p(Y|\mathbf{x}_0, U, \boldsymbol{\omega}) \quad (5)$$

$$= \log \mathcal{N}(\mathbf{u}|\mathbf{0}, \mathbf{K}_{\boldsymbol{\theta}}(Z, Z)) + \sum_{i=1}^N \log \mathcal{N}(\mathbf{y}_i|\mathbf{x}(t_i, U), \Omega) \quad (6)$$

$$= -\frac{1}{2} \mathbf{u}^T \mathbf{K}_{\boldsymbol{\theta}}(Z, Z)^{-1} \mathbf{u} - \frac{1}{2} \log |\mathbf{K}_{\boldsymbol{\theta}}(Z, Z)| - \frac{1}{2} \sum_{i=1}^N \sum_{j=1}^D \frac{(y_{i,j} - x_j(t_i, U, \mathbf{x}_0))^2}{\omega_j^2} - \sum_{i=1}^N \frac{1}{2} \log |\Omega| \quad (7)$$

$$= -\frac{1}{2} \mathbf{u}^T \mathbf{K}_{\boldsymbol{\theta}}(Z, Z)^{-1} \mathbf{u} - \frac{1}{2} \log |\mathbf{K}_{\boldsymbol{\theta}}(Z, Z)| - \frac{1}{2} \sum_{i=1}^N \sum_{j=1}^D \frac{(y_{i,j} - x_j(t_i, U, \mathbf{x}_0))^2}{\omega_j^2} - N \sum_{j=1}^D \log \omega_j \quad (8)$$

Our goal is to compute the gradients with respect to the initial state  $\mathbf{x}_0$ , latent vector field  $\tilde{U}$ , kernel parameters  $\boldsymbol{\theta}$  and noise variables  $\boldsymbol{\omega}$ . As explained in the paper, we compute the gradient of the posterior with respect to inducing vectors  $U$  and project them to the white domain thanks to noncentral parameterisation. The analytical forms of the partial derivatives are as follows:

$$\frac{\partial \log \mathcal{L}}{\partial u_k} = \sum_{i=1}^N \sum_{j=1}^D \frac{y_{i,j} - x_j(t_i, U, \mathbf{x}_0)}{\omega_j^2} \frac{\partial x_j(t_i, U, \mathbf{x}_0)}{\partial u_k} - \mathbf{K}_{\boldsymbol{\theta}}(Z, Z)^{-1} \mathbf{u} \quad (9)$$

$$\frac{\partial \log \mathcal{L}}{\partial (x_0)_d} = \sum_{i=1}^N \sum_{j=1}^D \frac{y_{i,j} - x_j(t_i, U, \mathbf{x}_0)}{\omega_j^2} \frac{\partial x_j(t_i, U, \mathbf{x}_0)}{\partial (x_0)_d} \quad (10)$$

$$\frac{\partial \log \mathcal{L}}{\partial \omega_j} = \frac{1}{\omega_j^3} \sum_{i=1}^N (y_{i,j} - x_j(t_i, U, \mathbf{x}_0))^2 - \frac{N}{\omega_j} \quad (11)$$

Seemingly hard to compute terms,  $\frac{\partial x_j(t_i, U, \mathbf{x}_0)}{\partial u_k}$  and  $\frac{\partial x_j(t_i, U, \mathbf{x}_0)}{\partial (x_0)_d}$ , are computed using sensitivities. The lengthscale parameter  $\ell$  is considered as a model complexity parameter and is chosen from a grid using cross-validation. We furthermore need the gradient with respect to the other kernel variable, i.e., the signal variance  $\sigma_f^2$ . Because  $\mathbf{K}_{\boldsymbol{\theta}}(Z, Z)$  and  $\mathbf{x}(t_i, U)$  are the functions of kernel, computing the gradients with respect to  $\sigma_f^2$  is not trivial and we make use of finite differences:

$$\frac{\partial \log \mathcal{L}}{\partial \sigma_f} = \frac{\log \mathcal{L}(\sigma_f + \delta) - \log \mathcal{L}(\sigma_f)}{\delta} \quad (12)$$

We use  $\delta = 10^{-4}$  to compute the finite differences.

One problem of using gradient-based optimization techniques is that they do not ensure the positivity of the parameters being optimized. Therefore, we perform the optimization of the noise standard deviations  $\boldsymbol{\omega} = (\omega_1, \dots, \omega_D)$  and signal variance  $\sigma_f$  with respect to their logarithms:

$$\frac{\partial \log \mathcal{L}}{\partial \log c} = \frac{\partial \log \mathcal{L}}{\partial c} \frac{\partial c}{\partial \log c} = \frac{\partial \log \mathcal{L}}{\partial c} c \quad (13)$$

where  $c \in (\sigma_f, \boldsymbol{\omega})$ . The training algorithm is given in Algorithm 1.

### 3. Implementation Details

We initialise the inducing vectors  $U = (\mathbf{u}_1, \dots, \mathbf{u}_M)$  by computing the empirical gradients  $\dot{\mathbf{y}}_i = \mathbf{y}_i - \mathbf{y}_{i-1}$ , and conditioning as

$$U_0 = \mathbf{K}(Z, Y) \mathbf{K}(Y, Y)^{-1} c \dot{\mathbf{y}}, \quad (14)$$

where we optimize the scale  $c$  against the posterior. The whitened inducing vector is obtained as  $\tilde{U}_0 = \mathbf{L}_{\boldsymbol{\theta}}^{-1} U_0$ . This procedure produces initial vector fields that partially match the trajectory already. We then do 100 restarts of the optimization from random perturbations  $\tilde{U} = \tilde{U}_0 + \varepsilon$ .

**Algorithm 1:** NPODE training algorithm

---

- 1 Initialize  $U, Z, \mathbf{x}_0, \boldsymbol{\theta}, \boldsymbol{\omega}$
  - 2 Compute  $\mathbf{K}_{\boldsymbol{\theta}}(Z, Z)$  and  $\mathbf{L}_{\boldsymbol{\theta}}$
  - 3 **while** *not converged* **do**
  - 4   Integrate the system to compute the path  $\mathbf{x}(t)$  and the sensitivities  $S(t)$
  - 5   Compute the gradients by (9), (10), (11), (12) and (13),
  - 6   Apply the noncentral parameterization trick:  $\nabla_{\tilde{v}} \log \mathcal{L} = \mathbf{L}_{\boldsymbol{\theta}}^T \nabla_U \log \mathcal{L}$
  - 7   Update  $\mathbf{x}_0, \tilde{U}, \sigma_f, \boldsymbol{\omega}$  based on L-BFGS update rule
  - 8   Set  $U = \mathbf{L}_{\boldsymbol{\theta}} \tilde{U}$
- 

We use L-BFGS gradient optimization routine in Matlab. We initialise the inducing vector locations  $Z$  on a equidistant fixed grid on a box containing the observed points. We select the lengthscales  $\ell_1, \dots, \ell_D$  using cross-validation from values  $\{0.5, 0.75, 1, 1.25, 1.5\}$ . In general large lengthscales induce smoother models, while lower lengthscales cause overfitting.
